# Supplementary material
Source: Springer Nature journal article supplement (https://www.springermedizin.de/resource/supplementary/12958_2004_194_MOESM4_ESM.pdf/9567348)

**Ubiquitin**

**H&E**

**TUNEL**

**P**

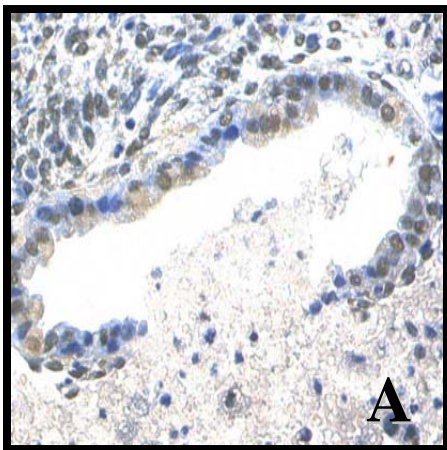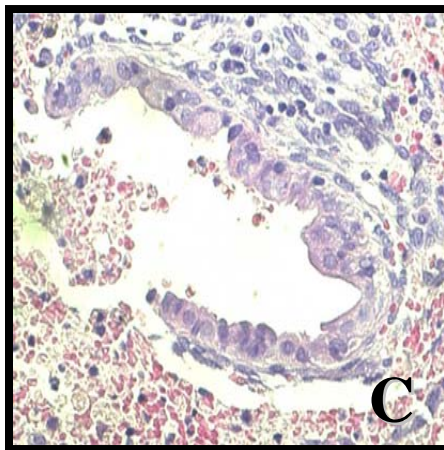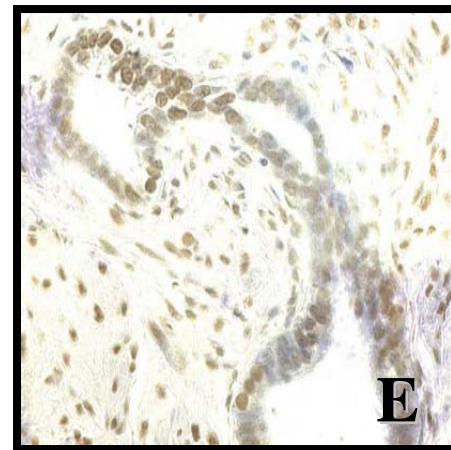

**A**

**C**

**E**

**S**

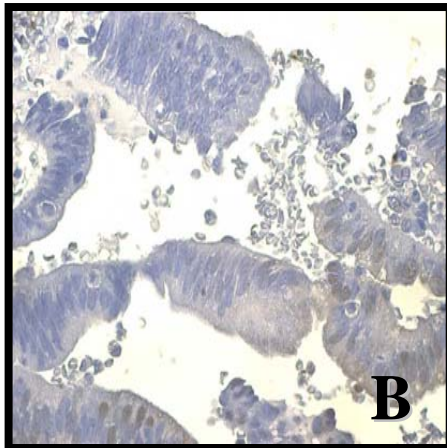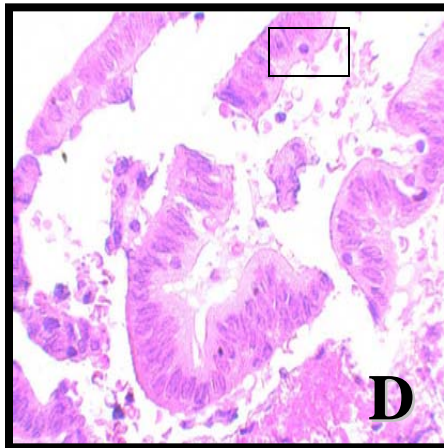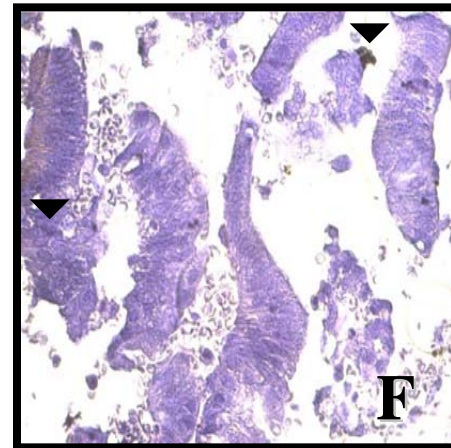

**B**

**D**

**F**

Supplement: MOESM4 [file 9567348]
